# Supplementary material for: A new high-Li+-conductivity Mg-doped Li1.5Al0.5Ge1.5(PO4)3 solid electrolyte with enhanced electrochemical performance for solid-state lithium metal batteries
Source: Royal Society of Chemistry journal article supplement (doi:10.1039/d0ta07807g), 2020-01-01
Supplement: d0ta07807g1.pdf [file d0ta07807g1.pdf]

### Supporting information

## **A New and high Li<sup>+</sup> conductive Mg doped Li<sub>1.5</sub>Al<sub>0.5</sub>Ge<sub>1.5</sub>(PO<sub>4</sub>)<sub>3</sub> Solid Electrolyte with Enhanced Electrochemical Performance for Solid-State Lithium Metal Battery**

Yosef Nikodimos<sup>a,c</sup>, Ljalem Hadush Abrha<sup>a</sup>, Haile Hisho Weldeyohannes<sup>a</sup>, Kassie Nigus Shitaw<sup>a</sup>, Nigusu Tiruneh Temesgen<sup>a</sup>, Bizualem Wakuma Olbasa<sup>a</sup>, Chen-Jui Huang<sup>a</sup>, Shi-Kai Jiang<sup>a</sup>, Chia-Hsin Wang<sup>e</sup>, Hwo-Shuenn Sheu<sup>e</sup>, She-Huang Wu<sup>b,c,f,\*</sup>, Wei-Nien Su<sup>b,f,\*</sup>, Chun-Chen Yang<sup>c,d,\*</sup>, Bing Joe Hwang<sup>a,e,f,\*</sup>

- a. Nano-electrochemistry Laboratory, Department of Chemical Engineering, National Taiwan University of Science and Technology, Taipei city 106, Taiwan
- b. Nano-electrochemistry Laboratory, Graduate Institute of Applied Science and Technology, National Taiwan University of Science and Technology, Taipei city 106, Taiwan
- c. Battery Research Center of Green Energy, Ming Chi University of Technology, New Taipei City 24301, Taiwan
- d. Department of Chemical Engineering, Ming Chi University of Technology, New Taipei City 24301, Taiwan
- e. National Synchrotron Radiation Research Center (NSRRC), Hsinchu 30076, Taiwan
- f. Sustainable Energy Development Center, National Taiwan University of Science and Technology, Taipei city 106, Taiwan

**Transference number calculation:** To further examine the influence of Mg as dopant on LAGP electrolyte, the transference number was estimated computationally from AIMD simulations. The mobility of each atom was investigated from their respective mean square displacement (MSD) profile. The diffusion value has been determined from the slope of MSD plots for each ion in the LAMGP material from the MSD slope. The transference number of the LAMGP material was determined from the D ratio as follow<sup>1</sup>:

$$t_{Li^+} = \frac{D_{Li^+}}{D_{Li^+} + D_{Al^{3+}} + D_{Mg^{2+}} + D_{Ge^{4+}} + D_{P^{5+}} + D_{O^{2-}}} \quad (5)$$

## Results

From the diffusion (D) values in the temperature range of 600-1400 °C, the diffusion value at 25 °C was determine by extrapolation followed by ionic conductivity( $\sigma_{Li^+}$ ) calculation using Equation (3). The values of D,  $\sigma$  and  $E_a$  for each composition are summarized in Table S1.

**Table S1:** Summery for the computational analysis of ionic conductivity at room temperature for the prepared samples

| $Li_{1+x+2y}Al_xMg_yGe_{2-x-y}(PO_4)_3$ | $D \times 10^{-6} (cm^2/s)$ | $\sigma (mS cm^{-1})$ | $E_a (eV)$ |
|-----------------------------------------|-----------------------------|-----------------------|------------|
| LAGP                                    | 0.821±0.003                 | 3.626                 | 0.286      |
| LAMGP                                   | 2.55±0.005                  | 7.996                 | 0.261      |
| LAMGP2                                  | 1.19±0.008                  | 4.602                 | 0.280      |
| LAMGP3                                  | 0.0285±0.005                | 0.550                 | 0.336      |
| LAMGP4                                  | 0.0179±0.009                | 0.232                 | 0.358      |
| LMGP                                    | 0.0869±0.007                | 0.102                 | 0.405      |

The  $\text{Li}^+$  MSD profile shown in Figure S1 indicates a linear increase with the time step, showing that  $\text{Li}^+$  mobility among different sites and transport over the lattice. In contrast, the MSD profile for the other ions (Al, Mg, Ge, P and O) is constant shows they remained close to their original position during the AIMD run. The noted zero slope from their MSD profiles essentially show they vibrate only about their original sites. Similar result was obtained at all simulation temperatures between 700 K and 1400 K.

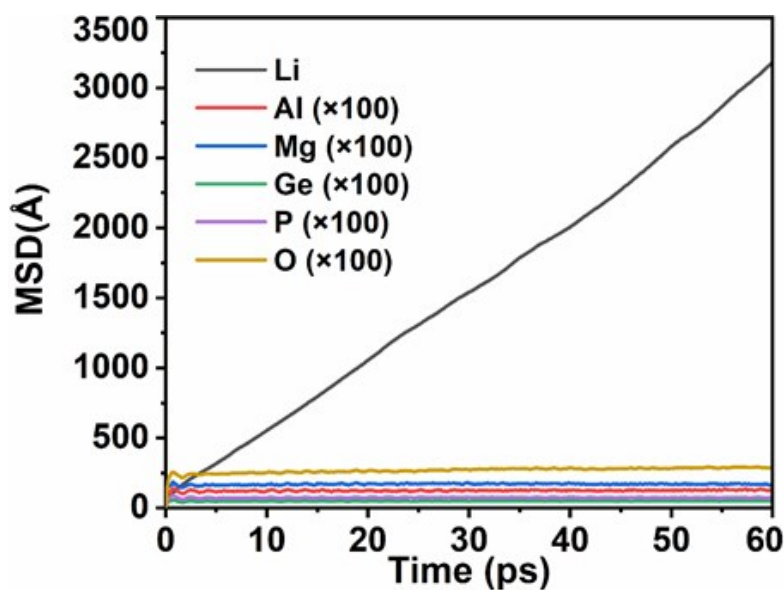

**Figure S1:** MSD plots of Li, Al, Mg, Ge, P, and O ions in  $\text{Li}_{1.6}\text{Al}_{0.4}\text{Mg}_{0.1}\text{Ge}_{1.5}(\text{PO}_4)_3$  at 600 K.

Plots for Al, Mg, Ge, P, and O are magnified by a factor of 100 to illustrate their behaviors.

As can be seen from Figure S2 of XRD patterns, the NASICON type structure of LAGP crystal was formed at all crystallization temperatures. At higher crystallization (850 °C), impurities like GeO<sub>2</sub> and AlPO<sub>4</sub> were observed.

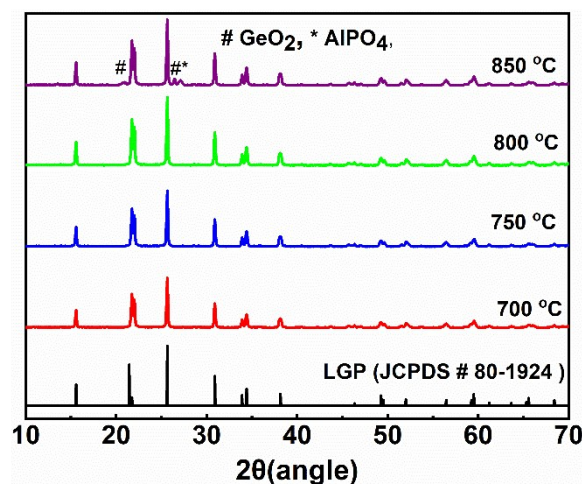

**Figure S2:** XRD patterns of LAGP specimen crystallized at different crystallization temperatures.

The SXRD pattern Rietveld refinement analysis for the samples crystallized at 700, 750, 800 and 850 °C are presented in Figure S3, while the structural parameters from the refinement are summarized in Table S2 and S3. From the Rietveld refinement results of all samples, the formation of a NASICON type dominant rhombohedral LAGP structure with  $R\bar{3}c$  space group was confirmed. For the LAMGP sample crystallized at 750 °C, the lattice parameters were obtained equal to  $a = 8.281 \text{ \AA}$  and  $c = 20.680 \text{ \AA}$ , in an excellent agreement with  $a = 8.25 \text{ \AA}$  and  $c = 20.46 \text{ \AA}$  (JCPDS 80–1924). These observations indicated the formation a NASICON-type LAMGP crystalline phase even though Ge<sup>4+</sup> is partly replaced by Al<sup>3+</sup> and Mg<sup>2+</sup>. The slight increment of LAMGP lattice parameters due to larger ionic radius of Mg<sup>2+</sup> ion led to insignificant structural alteration. With increasing crystallization temperature, the lattice parameters have been decreased which is due to the formation of impurities at higher

temperature. Therefore, the higher the impurity at higher crystallization temperature, the smaller LAMGP lattice parameters were obtained.

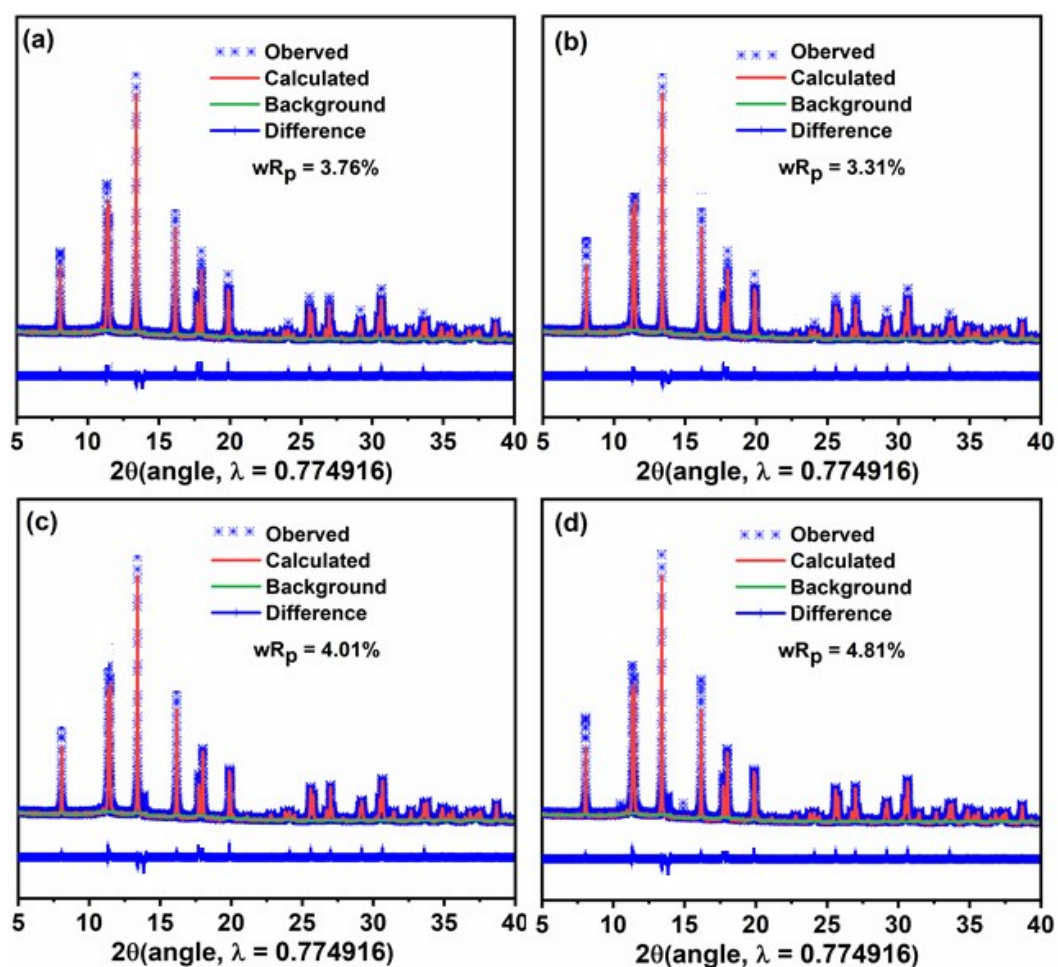

**Figure S3:** SXR D Rietveld refinement of LAMGP samples with a space group of  $R\bar{3}c$  and crystallization temperature of (a) 700 °C (b) 750 °C (c) 800 °C and (d) 850 °C.

Lattice parameters of LAGP and LAMGP samples comparison were retrieved from the Rietveld refinement analysis, as shown in Table S3, in order to understand the effect of  $Mg^{2+}$  on the materials dimension. Even though they are synthesized in the same procedure, the lattice parameters of LAMGP are larger than that of LAGP, which is as a result of  $Mg^{2+}$ 's larger ionic radius which is an advantage to enhance the ionic conductivity.

**Table S2:** Structural parameters of LAMGP (space group of R-3c) from the Rietveld refinement

| Atom    | Position             | Occupancy | Wyckoff site |
|---------|----------------------|-----------|--------------|
| Li1(M1) | 0.0, 0.0, 0.0        | 0.801     | 6b           |
| Li2(M2) | 0.0, 0.25, 0.05      | 0.146     | 36f          |
| Ge      | 0.0, 0.0, 0.141      | 0.752(3)  | 12c          |
| Al      | 0.0, 0.0, 0.141      | 0.1984(3) | 12c          |
| Mg      | 0.0, 0.0, 0.141      | 0.0496(3) | 12c          |
| P       | 0.288, 0.000, 0.250  | 1         | 18e          |
| O1      | 0.180, -0.015, 0.188 | 1         | 36f          |
| O2      | 0.185, 0.159, 0.082  | 1         | 36f          |

**Table S3:** Lattice parameters of LAGP and LAMGP electrolytes at different crystallization temperatures.

| Crystallization temperature |       | a(Å)  | c(Å)   | V(Å <sup>3</sup> ) | R <sub>p</sub> | wR <sub>p</sub> |
|-----------------------------|-------|-------|--------|--------------------|----------------|-----------------|
| 700 °C                      | LAGP  | 8.250 | 20.475 | 1220.550           | 4.93%          | 4.29%           |
|                             | LAMGP | 8.276 | 20.667 | 1223.003           | 4.06%          | 3.76%           |
| 750 °C                      | LAGP  | 8.253 | 20.477 | 1220.555           | 4.52%          | 4.43%           |
|                             | LAMGP | 8.281 | 20.680 | 1223.976           | 3.31%          | 3.31%           |
| 800 °C                      | LAGP  | 8.254 | 20.478 | 1220.602           | 3.68%          | 3.96%           |
|                             | LAMGP | 8.274 | 20.619 | 1222.103           | 3.73%          | 4.01%           |
| 850 °C                      | LAGP  | 8.249 | 20.391 | 1219.215           | 4.32%          | 4.69%           |
|                             | LAMGP | 8.269 | 20.470 | 1220.459           | 4.97%          | 4.81%           |

**Table S4:** Composition analysis of elements in LAMGP (Li<sub>1.6</sub>Al<sub>0.4</sub>Mg<sub>0.1</sub>Ge<sub>1.5</sub>(PO<sub>4</sub>)<sub>3</sub>) samples from ICP-OES measurements

| Crystallization Temperature | Weight % |       |       |        |        | Chemical formula                                                                                                   |
|-----------------------------|----------|-------|-------|--------|--------|--------------------------------------------------------------------------------------------------------------------|
|                             | Li       | Al    | Mg    | Ge     | P      |                                                                                                                    |
| 700 °C                      | 4.912    | 4.780 | 1.085 | 48.144 | 41.079 | Li <sub>1.602</sub> Al <sub>0.401</sub> Mg <sub>0.101</sub> Ge <sub>1.5</sub> P <sub>3.002</sub> O <sub>12</sub>   |
| 750 °C                      | 4.910    | 4.782 | 1.074 | 48.157 | 41.077 | Li <sub>1.601</sub> Al <sub>0.401</sub> Mg <sub>0.1</sub> Ge <sub>1.5</sub> P <sub>3.001</sub> O <sub>12</sub>     |
| 800 °C                      | 4.907    | 4.743 | 1.055 | 48.212 | 41.083 | Li <sub>1.597</sub> Al <sub>0.397</sub> Mg <sub>0.098</sub> Ge <sub>1.499</sub> P <sub>2.996</sub> O <sub>12</sub> |
| 850 °C                      | 4.891    | 4.727 | 1.056 | 48.229 | 41.097 | Li <sub>1.589</sub> Al <sub>0.395</sub> Mg <sub>0.098</sub> Ge <sub>1.497</sub> P <sub>2.992</sub> O <sub>12</sub> |

Figure S4 shows EDX elemental analysis of the LAMGP samples crystallized at different temperatures. The analysis was conducted on grains surface (shaped crystals) and specified points of grain boundaries. Results of the analysis are summarized in Table S5 and S6.

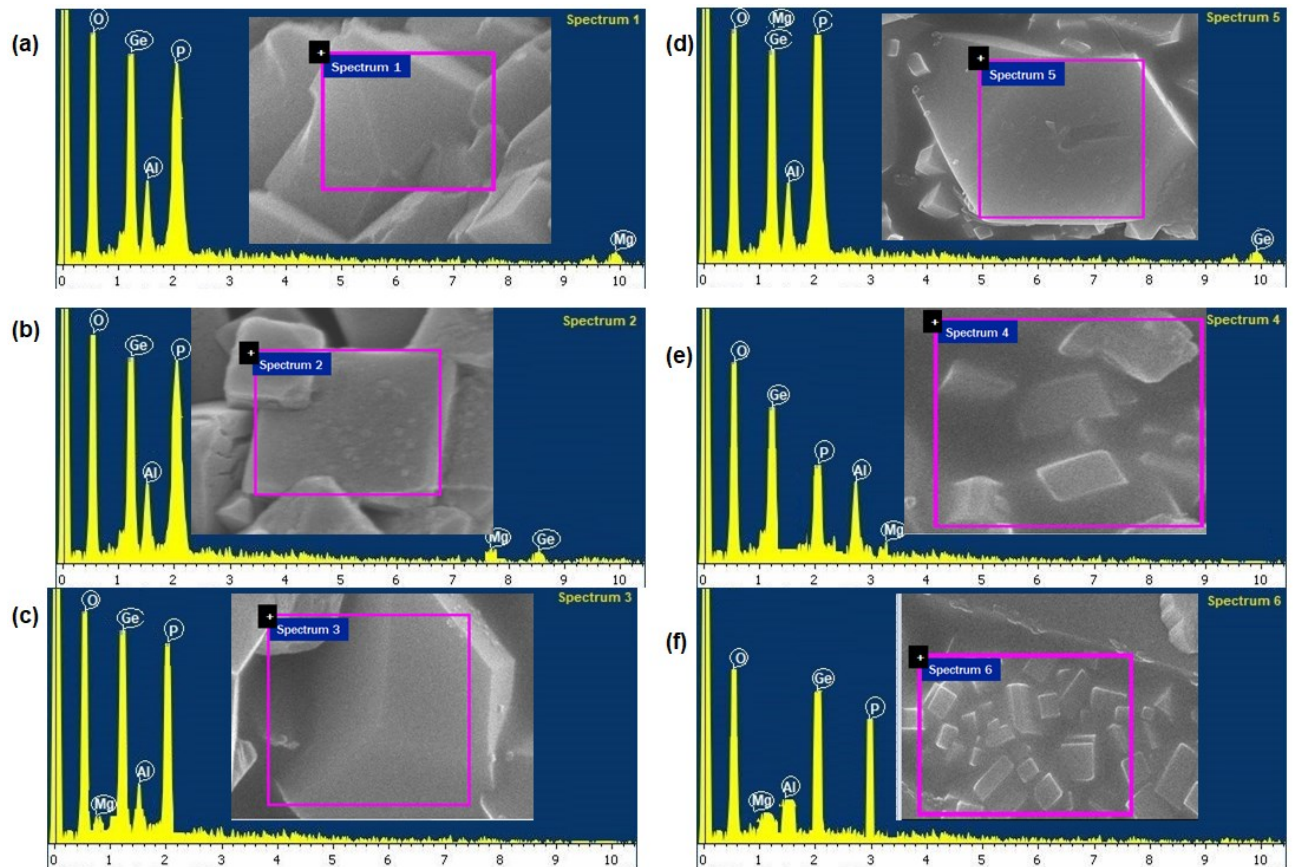

**Figure S4:** EDX analysis of LAMGP at intragrain (a). 700 °C, (b). 750 °C, (c). 800 °C, (d). 850 °C and grain boundary (e). 800 °C, (f). 850 °C.

Table S5 shows the stoichiometric composition at grains of the LAMGP samples which were crystallized at different temperatures.

**Table S5:** EDX analysis of LAMGP at intragrain crystallized at different temperatures

| Element         | EDX analysis (weight%)                                                                                      |                                                                                                              |                                                                                                               |                                                                                                               |
|-----------------|-------------------------------------------------------------------------------------------------------------|--------------------------------------------------------------------------------------------------------------|---------------------------------------------------------------------------------------------------------------|---------------------------------------------------------------------------------------------------------------|
|                 | 700 °C                                                                                                      | 750 °C                                                                                                       | 800 °C                                                                                                        | 850 °C                                                                                                        |
| Al              | 2.651                                                                                                       | 2.655                                                                                                        | 2.485                                                                                                         | 2.208                                                                                                         |
| Mg              | 0.597                                                                                                       | 0.598                                                                                                        | 0.599                                                                                                         | 0.497                                                                                                         |
| Ge              | 26.727                                                                                                      | 26.684                                                                                                       | 26.402                                                                                                        | 26.197                                                                                                        |
| P               | 22.896                                                                                                      | 22.852                                                                                                       | 22.745                                                                                                        | 22.021                                                                                                        |
| O               | 47.129                                                                                                      | 47.211                                                                                                       | 47.769                                                                                                        | 49.077                                                                                                        |
| Li              | -                                                                                                           | -                                                                                                            | -                                                                                                             | -                                                                                                             |
| Overall formula | Li <sub>1.6</sub> Al <sub>0.4</sub> Mg <sub>0.1</sub> Ge <sub>1.498</sub> P <sub>3.01</sub> O <sub>12</sub> | Li <sub>1.6</sub> Al <sub>0.4</sub> Mg <sub>0.1</sub> Ge <sub>1.493</sub> P <sub>2.999</sub> O <sub>12</sub> | Li <sub>1.6</sub> Al <sub>0.37</sub> Mg <sub>0.099</sub> Ge <sub>1.46</sub> P <sub>2.95</sub> O <sub>12</sub> | Li <sub>1.6</sub> Al <sub>0.32</sub> Mg <sub>0.08</sub> Ge <sub>1.498</sub> P <sub>2.78</sub> O <sub>12</sub> |

Table S6 shows the stoichiometric composition of the impurities at grain boundaries for the LAMGP samples which were crystallized at 800 °C and 850 °C.

**Table S6:** EDX analysis (in wt%) of LAMGP at the grain boundaries crystallized at different temperatures

| Element | 800 °C                               | 850 °C                                                                     |
|---------|--------------------------------------|----------------------------------------------------------------------------|
| Al      | 11.847                               | 5.256                                                                      |
| Mg      | 0.534                                | 4.736                                                                      |
| Ge      | 31.895                               | 28.301                                                                     |
| P       | 13.598                               | 18.099                                                                     |
| O       | 42.126                               | 43.608                                                                     |
| Result  | GeO <sub>2</sub> + AlPO <sub>4</sub> | GeO <sub>2</sub> + AlPO <sub>4</sub> + MgGe(PO <sub>4</sub> ) <sub>2</sub> |



Figure S5 shows the grain size difference between LAGP and LAMGP. There was a significant grain size enhancement after LAGP doped by  $Mg^{2+}$ .

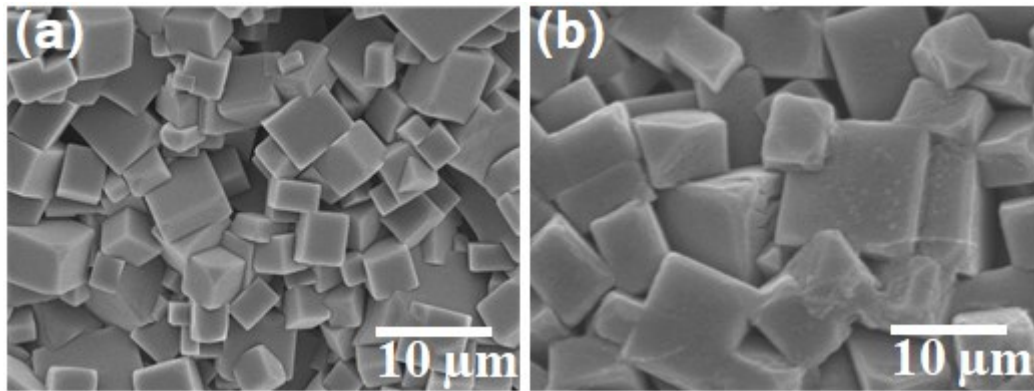

**Figure S5:** Grain size comparison of (a) LAGP and (b) LAMGP

Before gold sputtering, atomic force microscopy (AFM) images were measured (Figure S6) to check the roughness of the LAMGP pellets crystalized at different temperatures. Even though, the grain size is at  $\mu m$  level, the roughness was *ca.* 4.01, 4.69, 6.03 and 7.87 nm for 700-850  $^{\circ}C$  crystallization temperatures, respectively, which show the smoothness of the pellets.

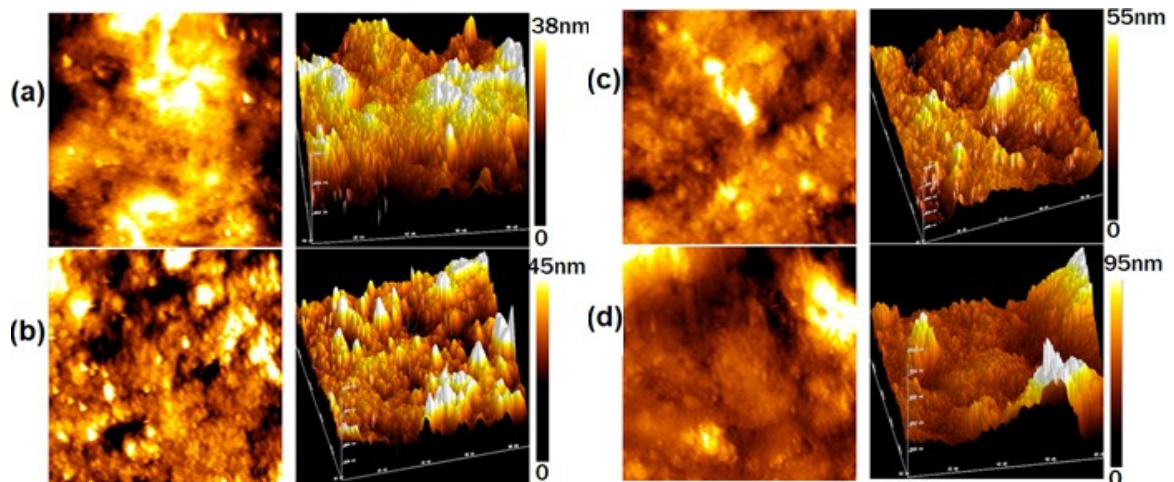

**Figure S6:** AFM topography images of LAMGP pellets obtained from different crystallized temperatures (a). 700  $^{\circ}C$ , (b). 750  $^{\circ}C$ , (c). 800  $^{\circ}C$  and (d). 850  $^{\circ}C$ , measured with a scan size of  $15.7 \mu m \times 17.9 \mu m$ . Right: 2D and left: 3D

EIS Nyquist plots were recorded for LAGP samples crystallized in the temperature range of between 700 – 850 °C. As can be seen from Figure S7, the highest ionic conductivity and lowest activation energy for LAGP was obtained at 800 °C crystallization temperature.

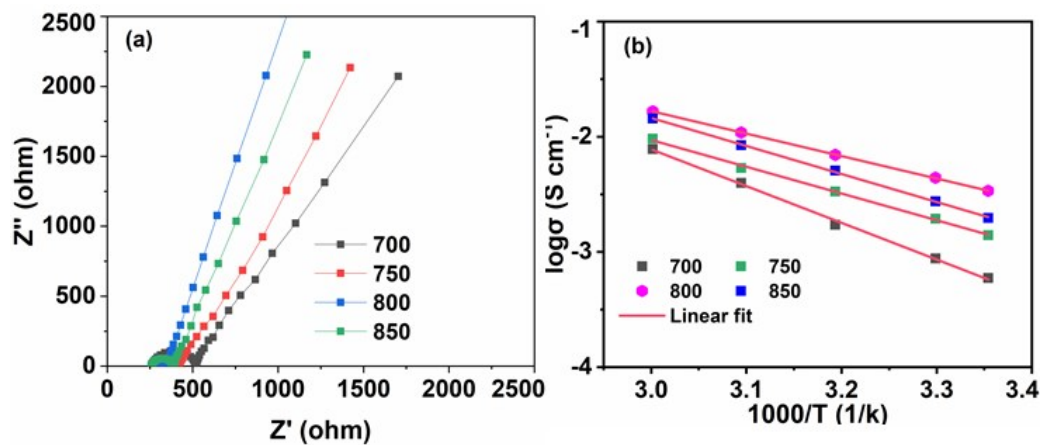

**Figure S7:** (a) Nyquist plot of LAGP electrolyte crystallized at various temperatures measured at 25 °C, (b). ionic conductivities of LAGP electrolytes varied with temperatures

Table S7 summarizes the bulk, grain boundary and total ionic conductivities of LAGP and LAMGP samples crystallized at different temperatures. Furthermore, grain size and relative densities of these samples are displayed. As shown in Table S7, when crystallization temperature increase grain size was also increased. However, relative density was decreased at higher crystallization temperature due to the formation of impurities. Overall, LAMGP sample crystallized at 750 °C is the best in all aspects relative to the remaining samples.

**Table S7:** Conductivities,  $E_a$  and relative densities of LAMGP and LAGP pellets at various crystallization temperatures.

| Crystallization Temperature |       | $\sigma(\text{mS cm}^{-1})$ |               |            | $E_a$     | Relative density | Grain size ( $\mu\text{m}$ ) |
|-----------------------------|-------|-----------------------------|---------------|------------|-----------|------------------|------------------------------|
|                             |       | $\sigma_b$                  | $\sigma_{gb}$ | $\sigma_T$ |           |                  |                              |
| 700                         | LAGP  | 0.507                       | 0.081         | 0.118      | 0.50±0.02 | 88.4%            | 1.097                        |
|                             | LAMGP | 0.863                       | 0.218         | 0.371      | 0.31±0.03 | 90.2%            | 9.946                        |
| 750                         | LAGP  | 0.997                       | 0.233         | 0.396      | 0.35±0.03 | 90.5%            | 1.847                        |
|                             | LAMGP | 7.435                       | 1.51          | 0.913      | 0.28±0.01 | 96.3%            | 12.059                       |
| 800                         | LAGP  | 2.896                       | 0.642         | 0.516      | 0.29±0.02 | 93.8%            | 3.573                        |
|                             | LAMGP | 4.84                        | 0.830         | 0.417      | 0.28±0.02 | 94.3%            | 13.817                       |
| 850                         | LAGP  | 1.514                       | 0.351         | 0.428      | 0.32±0.03 | 92.7%            | 5.182                        |
|                             | LAMGP | 3.68                        | 0.427         | 0.259      | 0.29±0.04 | 92.9%            | 15.089                       |

As can be seen from Table S8, the Mg doped LAGP electrolyte offered the highest Li<sup>+</sup> conductivity (bulk, grain boundary and total) relative to previously reported LAGP based electrolytes synthesized using the same approach, a melt-quenching method.

**Table S8:** Comparison of ionic conductivities at room-temperature for LAGP based solid electrolytes synthesized using a melt-quenching method.

| Sample                                                                                                       | Crystall. temperature (°C) | $\sigma$ (mS cm <sup>-1</sup> ) |      |       | E <sub>a</sub> (eV) | Ref.             |
|--------------------------------------------------------------------------------------------------------------|----------------------------|---------------------------------|------|-------|---------------------|------------------|
|                                                                                                              |                            | bulk                            | gb   | total |                     |                  |
| Li <sub>1.5</sub> Al <sub>0.5</sub> Ge <sub>1.5</sub> (PO <sub>4</sub> ) <sub>3</sub>                        | 825                        | 4.22                            |      |       | 0.3                 | 2                |
| Li <sub>1.5</sub> Al <sub>0.4</sub> Cr <sub>0.1</sub> Ge <sub>1.5</sub> (PO <sub>4</sub> ) <sub>3</sub>      | 850                        | 6.65                            |      |       | 0.292               | 3                |
| Li <sub>1.5</sub> Al <sub>0.33</sub> Sc <sub>0.17</sub> Ge <sub>1.5</sub> (PO <sub>4</sub> ) <sub>3</sub>    | 800                        | 5.826                           |      |       | 0.282               | 4                |
| Li <sub>1.6</sub> Al <sub>0.4</sub> Ba <sub>0.1</sub> Ge <sub>1.5</sub> (PO <sub>4</sub> ) <sub>3</sub>      | 750                        | 0.88                            | 1    | 0.47  | 0.314               | 5                |
| Li <sub>1.5</sub> Al <sub>0.5</sub> Ge <sub>1.5</sub> (PO <sub>4</sub> ) <sub>3</sub> -0.05Li <sub>2</sub> O | 800                        | 1.18                            |      | 0.725 | 0.31                | 6                |
| Li <sub>1.5</sub> Al <sub>0.5</sub> Ge <sub>1.5</sub> (PO <sub>4</sub> ) <sub>3</sub>                        | 850                        | 5.08                            |      |       | 0.373               | 7                |
| Li <sub>1.6</sub> Al <sub>0.4</sub> Mg <sub>0.1</sub> Ge <sub>1.5</sub> (PO <sub>4</sub> ) <sub>3</sub>      | 750                        | 7.435                           | 1.51 | 0.913 | 0.275               | <b>This work</b> |

Figure S9 (a) shows XRD patterns for LAMGP samples prepared from Mg<sub>3</sub>(PO<sub>4</sub>)<sub>2</sub>, MgO and MgCO<sub>3</sub> precursors. Each of them displays a typical NASICON type structure similar to LGP (JCPDS # 80-1924 index file). However, visible impurities were detected for the MgO and MgCO<sub>3</sub> precursors. The appearance of MgO in the XRD patterns is an indication there is still unmolten MgO in the material due to its very high melting point (ca. 2852 °C). Figure S9 (b) shows the Nyquist plots recorded at 25 °C for LAMGP samples synthesized from the possible different types of Mg precursors. All the plots show a semicircle at high-medium frequencies, which is connected with a diffusion tail at low frequencies. The total resistance (R<sub>total</sub>) is associated with the semicircle, which is the sum of R<sub>b</sub> and R<sub>gb</sub>.

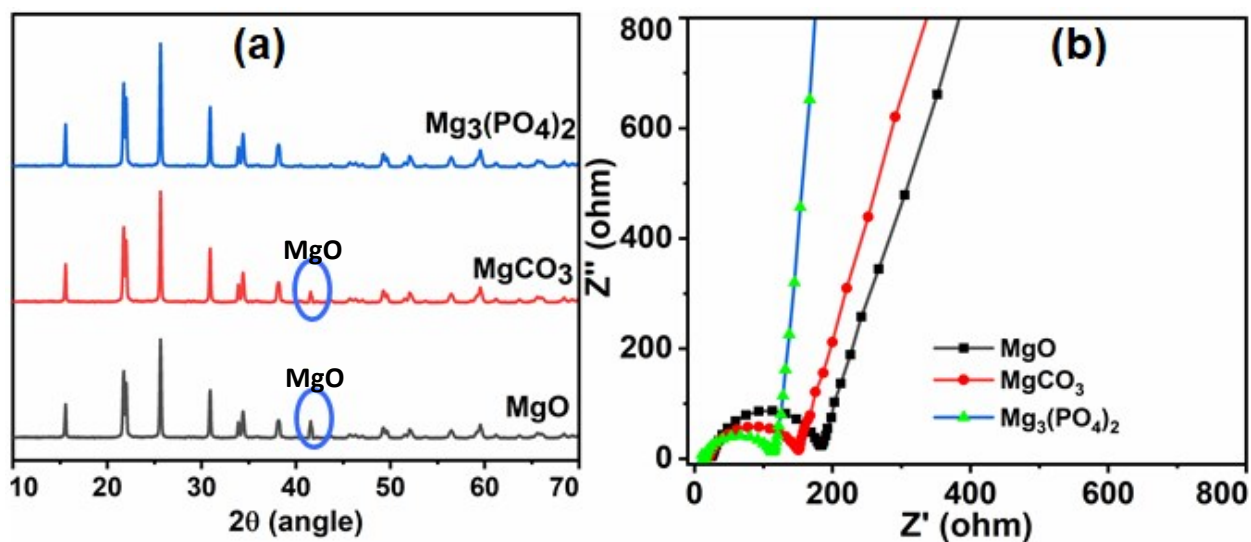

**Figure S8:** LAMGP electrolyte using different Mg precursors (a). XRD patterns (b). EIS Nyquist plots recorded at 25 °C

As shown in Figure S9, LAGP pellet is more porous relative to LAMGP pellet, indicating the densification of LAGP by doping using  $Mg^{2+}$ .

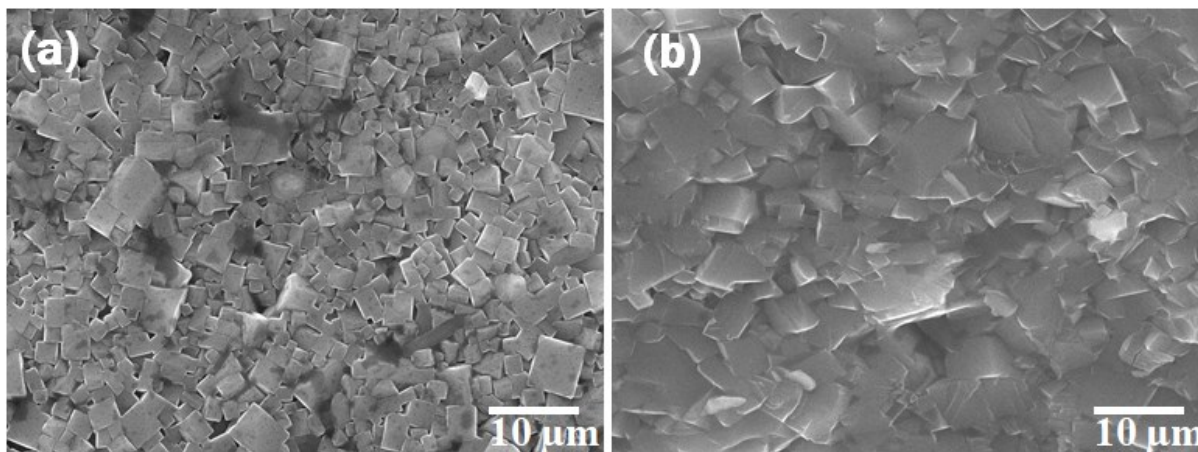

**Figure S9:** Cross-section SEM images (a) LAGP and (b) LAMGP pellets

Table S9 shows ionic conductivities, grain size and grain size of LAMGP samples synthesized from different Mg precursors. The LAMGP electrolyte which synthesized using  $\text{Mg}_3(\text{PO}_4)_2$  as Mg precursor showed better properties in all aspects. The difference in grain boundary conductivity and densification among the samples is mainly due to the impurity at the grain boundaries and the samples' degree of porosity.

**Table S9:** Summary of  $\text{Li}^+$  conductivity and relative density (RD) of LAMGP electrolyte prepared from different Mg precursors.

| Crystallization temperature (°C) | Precursor of Mg in LAMGP electrolyte |               |         |                                 |               |         |                                 |               |         |
|----------------------------------|--------------------------------------|---------------|---------|---------------------------------|---------------|---------|---------------------------------|---------------|---------|
|                                  | $\text{Mg}_3(\text{PO}_4)_2$         |               |         | MgO                             |               |         | $\text{MgCO}_3$                 |               |         |
|                                  | $\sigma$ (mS cm <sup>-1</sup> )      |               | R.D (%) | $\sigma$ (mS cm <sup>-1</sup> ) |               | R.D (%) | $\sigma$ (mS cm <sup>-1</sup> ) |               | R.D (%) |
|                                  | $\sigma_b$                           | $\sigma_{gb}$ |         | $\sigma_b$                      | $\sigma_{gb}$ |         | $\sigma_b$                      | $\sigma_{gb}$ |         |
| <b>700</b>                       | 0.863                                | 0.218         | 90.2    | 0.294                           | 0.063         | 87.9    | 0.582                           | 0.099         | 89.9    |
| <b>750</b>                       | 7.435                                | 1.51          | 96.3    | 0.816                           | 0.119         | 89.4    | 2.728                           | 0.606         | 92.9    |
| <b>800</b>                       | 4.84                                 | 0.83          | 94.3    | 2.047                           | 0.443         | 91.14   | 2.215                           | 0.514         | 92      |
| <b>850</b>                       | 3.68                                 | 0.427         | 92.9    | 1.152                           | 0.194         | 88.8    | 1.382                           | 0.282         | 90.1    |

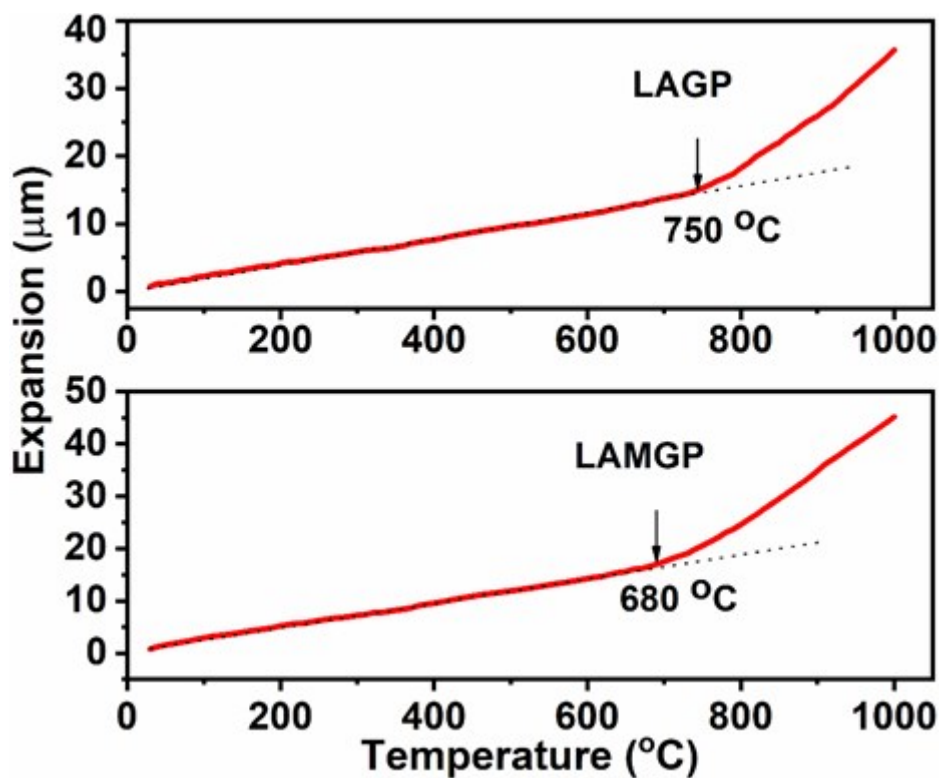

**Figure S10:** Thermomechanical analysis of LAGP and LAMGP pellets as a function of temperature.

Figure S11 shows photos of LAMGP pellets soaked in liquid electrolyte (LE) at the initial state and after 10 days. There was no any observable change in color of the pellet and the liquid electrolyte after 10 days, as shown in the photo.

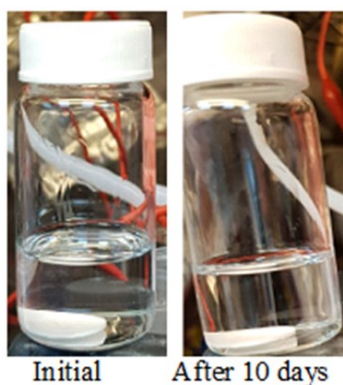

**Figure S11:** Photos of LAMGP pellet in liquid electrolyte at the initial state and after 10 days.



SEM image and XRD pattern of the pellet were measured before and after soaking in the liquid electrolyte, then compared to each other to investigate if there is any significant difference between them. Figure S12 (a and b) presents SEM images of the LAMGP pellet before and after LE treatment. There was not a significant color and morphology change observed between the two cases, which have a dense ceramic surface and almost the same grain size of approximately 10-15  $\mu\text{m}$ . Furthermore, as presented in Figure S12 (c and d), the XRD patterns for the LAMGP pellet before and after soaking in the liquid electrolyte well matched to each other, confirming that LAMGP is structurally stable in the mentioned liquid electrolyte.

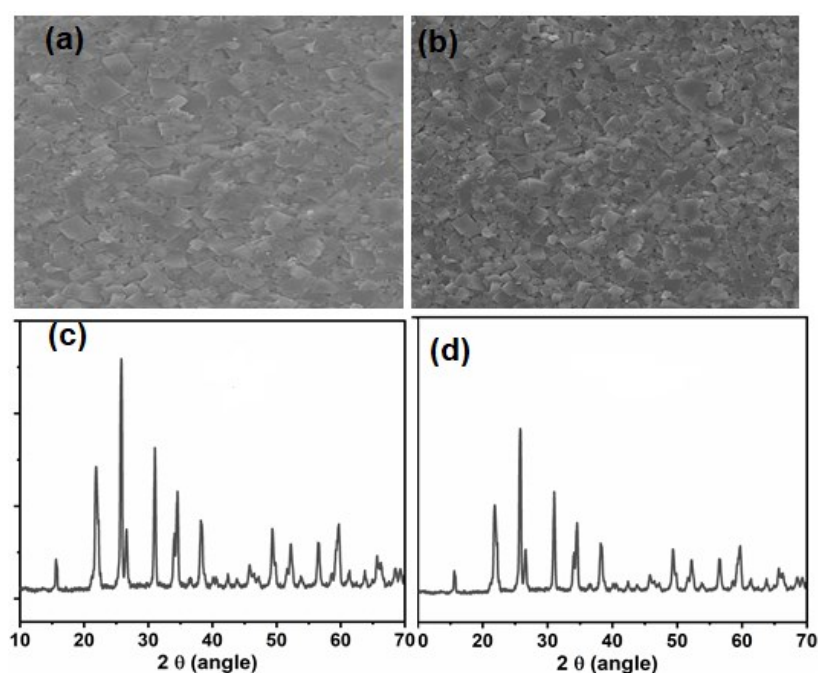

**Figure S12:** SEM images of LAMGP pellet (a) as synthesized (b) after soaking in LE for 10 days. XRD pattern of LAMGP pellet (c) as synthesized (d) after soaking in LE for 10 days.

Figure S13 displays the Raman spectra of the LAMGP pellet before and after soaking in LE. The spectra for LAMGP pellet before soaking in liquid electrolyte show many strong Raman bands, attributed to the vibrations of units in the material.<sup>8</sup> Similarly, no new peak was noticed



in the Raman spectroscopy measurement after soaking of the LAMGP pellet in the liquid electrolyte, which indicates that the LAMGP pellet is chemically stable towards the used LE. Moreover, the chemical compatibility between the LE and the LAMGP pellet was further examined using ICP-OES measurement over the LE, which have been used to soak the pellet. The ICP-OES measurement was employed to detect if  $Mg^{2+}$ ,  $Al^{3+}$  and  $Ge^{4+}$  ions were remained in the LE when the LAMGP pellet soaked. From the ICP-OES measurement there was no  $Mg^{2+}$ ,  $Al^{3+}$  or  $Ge^{4+}$  ion detected. This indicates there is no any chemical reaction between the LE and the pellet, a further confirmation good chemical compatibility between the LE and the LAMGP pellet.

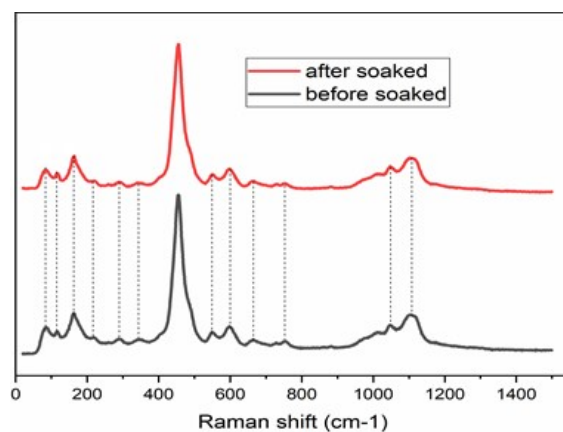

**Figure S13:** Comparison of Raman spectra of LAMGP pellets before and after being soaked in LE for 10 days.

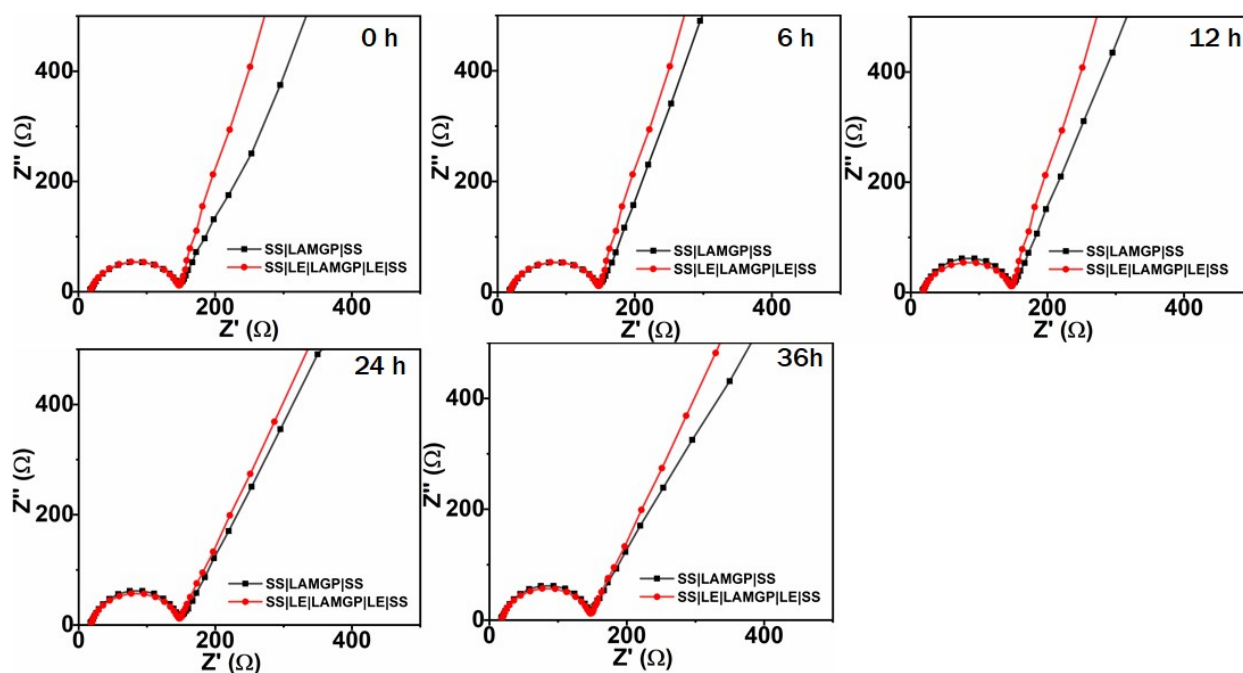

**Figure S14:** EIS results of SS|LAMGP|SS and SS|LE|LAMGP|LE|SS as function of time.

**Table S10:** summary of the electrochemical performance of cells with different configurations.

| Electrolyte               | Coulombic efficiency  |         | Initial Capacity<br>$\text{mA h g}^{-1}$ |                    | Capacity Retention     |
|---------------------------|-----------------------|---------|------------------------------------------|--------------------|------------------------|
|                           | 1 <sup>st</sup> cycle | average | charge capacity                          | discharge capacity |                        |
| LAMGP/10 $\mu\text{L}$ LE | 86.7%                 | 98.14%  | 167.6                                    | 145.4              | 80.5% after 250 cycles |
| LAGP/10 $\mu\text{L}$ LE  | 84.2%                 | 97.89%  | 154.7                                    | 130.3              | 80.5% after 155 cycles |
| 10 $\mu\text{L}$ LE       | 91.6%                 |         | 188.3                                    | 172.5              |                        |

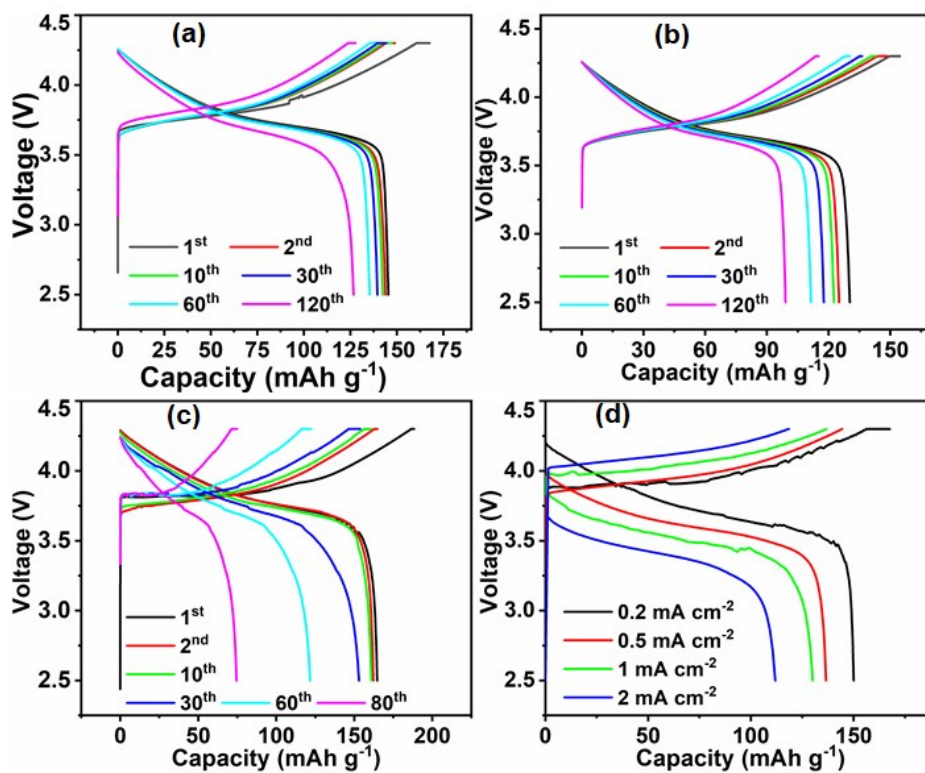

**Figure S15:** Charge/discharge profiles at different cycles of the cells at  $0.2 \text{ mA cm}^{-2}$  and  $25^\circ\text{C}$ . (a). Li/LE/LAMGP/LE/NMC, (b).. Li/LE/LAGP/LE/NMC, (c) Li/10 $\mu\text{L}$  LE/NMC and (d). charge-discharge curves of Li/LE/LAMGP/LE/NMC cell at different current densities, varying from  $0.2 \text{ mA cm}^{-2}$  to  $2 \text{ mA cm}^{-2}$ .

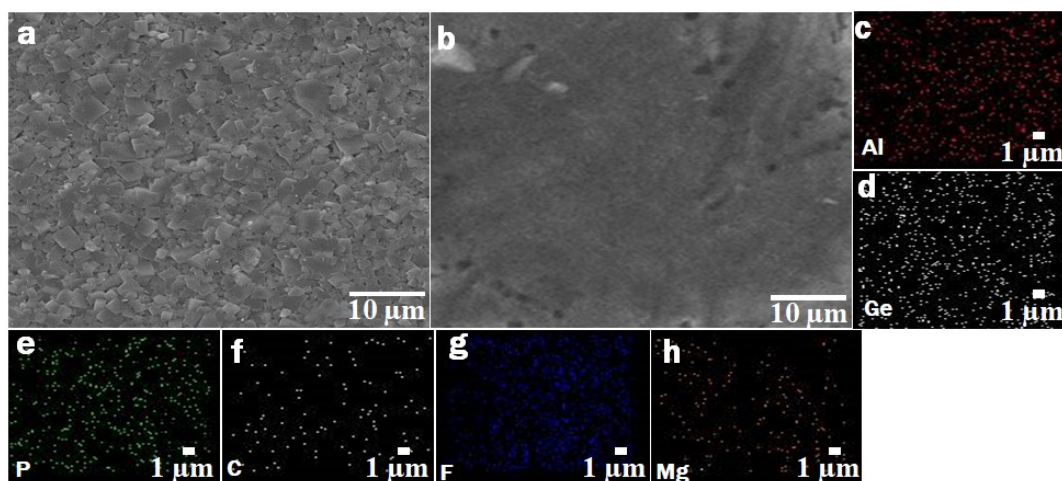

**Figure S16.** LAMGP pellet SEM images for post cycling SELEI analysis. (a). before cycling. (b). after 120 cycles. (c-g). after cycling EDS mapping of elements after 120 cycles.

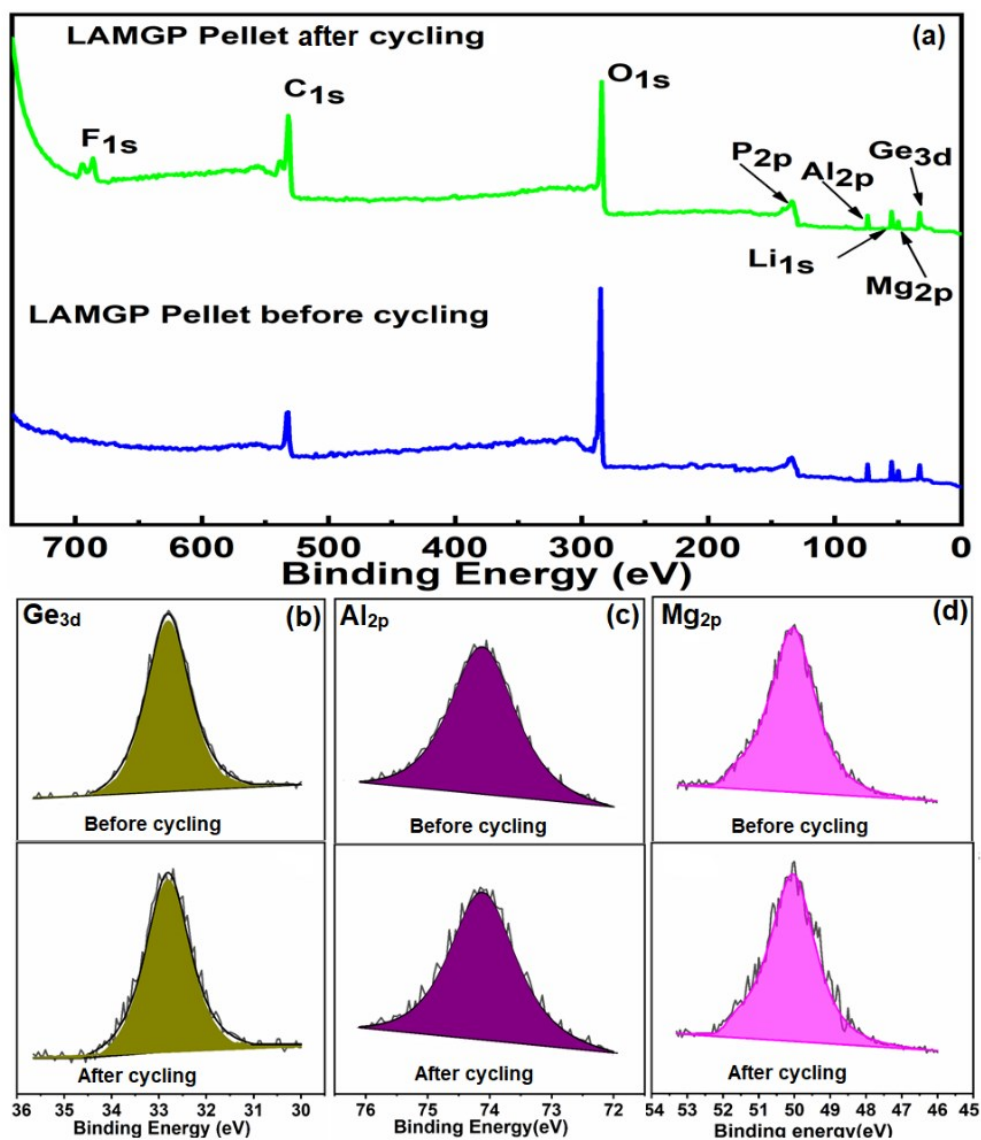

**Figure S17:** X-ray photoelectron spectra before and after electrochemical cycling (a). full survey of LAMGP pellets and (b-d). for Ge, Al and Mg, respectively.

## References

1. T. Hou, G. Yang, N. N. Rajput, J. Self, S.-W. Park, J. Nanda and K. A. Persson, *Nano Energy*, 2019, **64**, 103881.

2. J. S. Thokchom and B. Kumar, *J. Power Sources*, 2010, **195**, 2870-2876.
3. M. Illbeigi, A. Fazlali, M. Kazazi and A. H. Mohammadi, *Solid State Ion.*, 2016, **289**, 180-187.
4. Y. Nikodimos, M.-C. Tsai, L. H. Abrha, H. H. Weldeyohannis, S.-F. Chiu, H. K. Bezabh, K. N. Shitaw, F. W. Fenta, S.-H. Wu, W.-N. Su, C.-C. Yang and B. J. Hwang, *J. mater. chem. A*, 2020, **8**, 11302-11313.
5. M. Kotobuki, E. Hanc, B. Yan, J. Molenda and L. Lu, *Ceram. Int.*, 2017, **43**, 12616-12622.
6. X. Xu, Z. Wen, X. Wu, X. Yang and Z. Gu, *J AM CERAM SOC*, 2007, **90**, 2802-2806.
7. J. S. Thokchom and B. Kumar, *J. Power Sources*, 2008, **185**, 480-485.
8. S. Pershina, A. Pankratov, E. Vovkotrub and B. Antonov, *Ionics*, 2019, **25**, 4713-4725.
